# Supplementary material for: Aromatherapy improves cognitive dysfunction in senescence-accelerated mouse prone 8 by reducing the level of amyloid beta and tau phosphorylation
Source: PubMed Central journal article supplement (PMC7556469; doi:10.1371/journal.pone.0240378), 2020-10-14

# Hippocampus

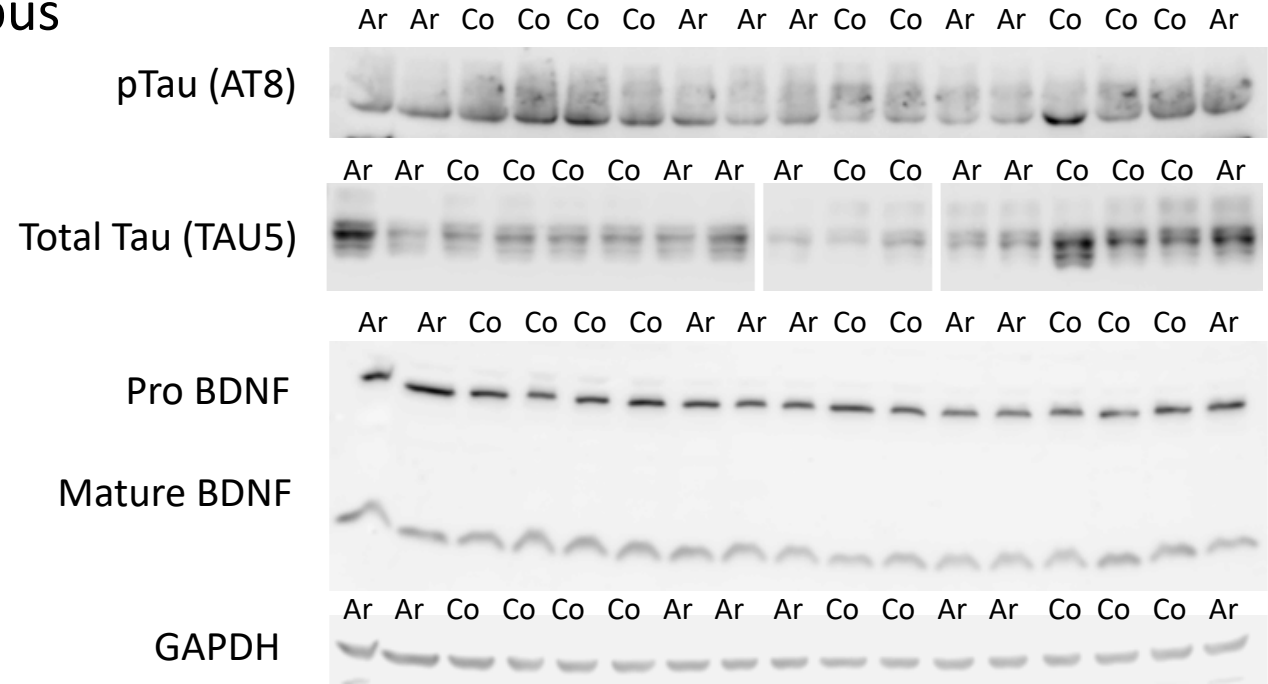

# Olfactory bulb

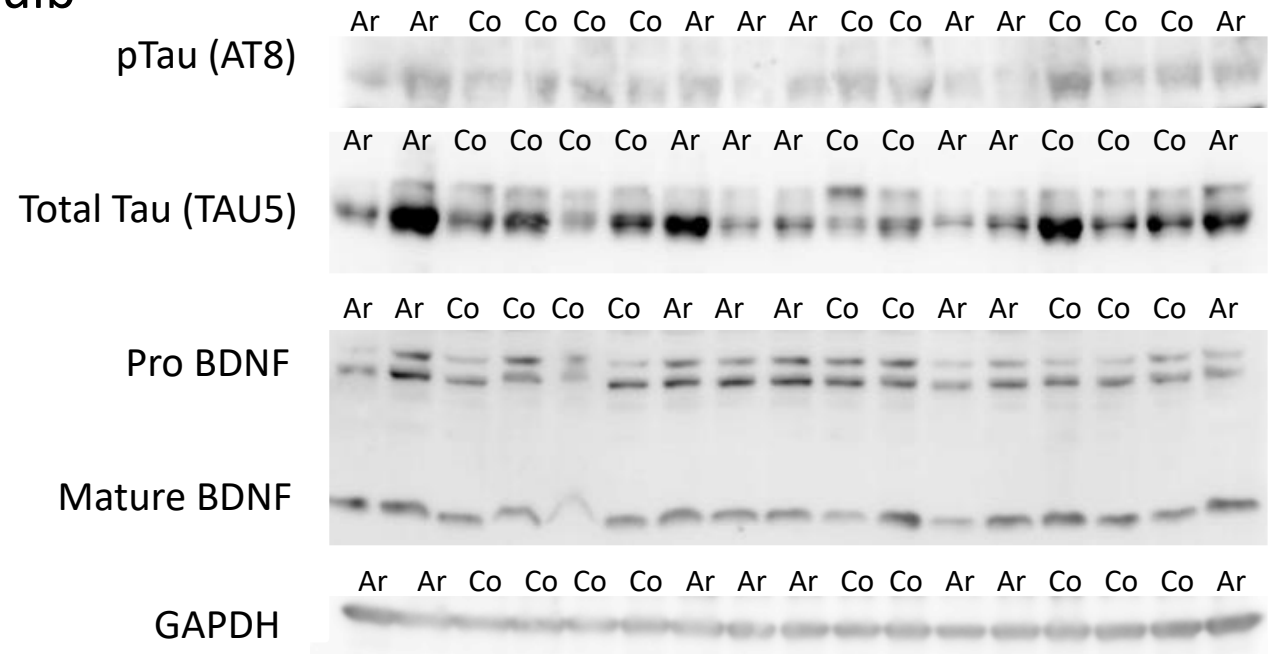

Co: Control  
Ar: Aromatherapy (Group C)

# Original images

## Hippocampus BDNF

Pro(30-32kDa)

Mature (16kDa)

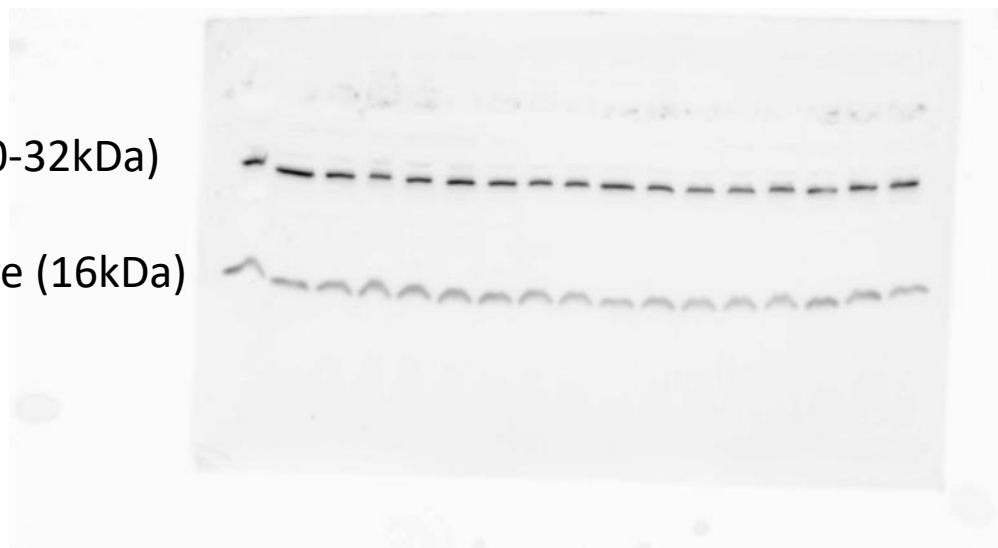

## Hippocampus pTau (AT8) and GAPDH (\*reblot after BDNF detection shown above)

Long-time exposure

Short-time exposure

pTau(60kDa)  
GAPDH  
(37kDa)

GAPDH (37 kDa)

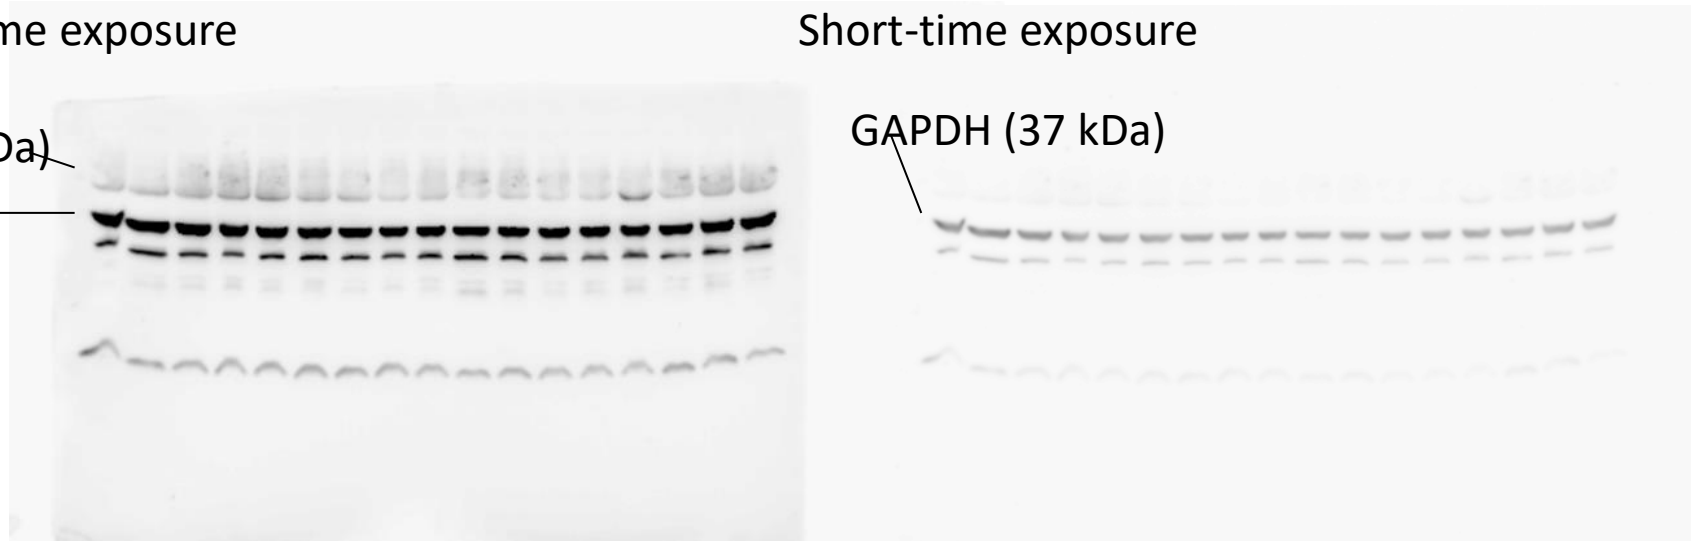

# Hippocampus Total tau (\*including other samples)

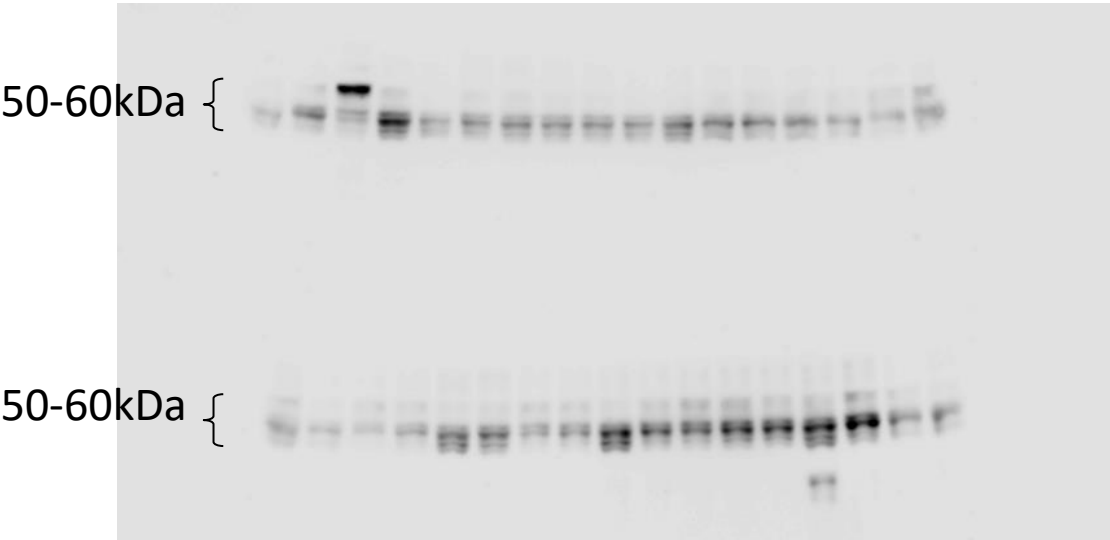

□ : the samples in this study

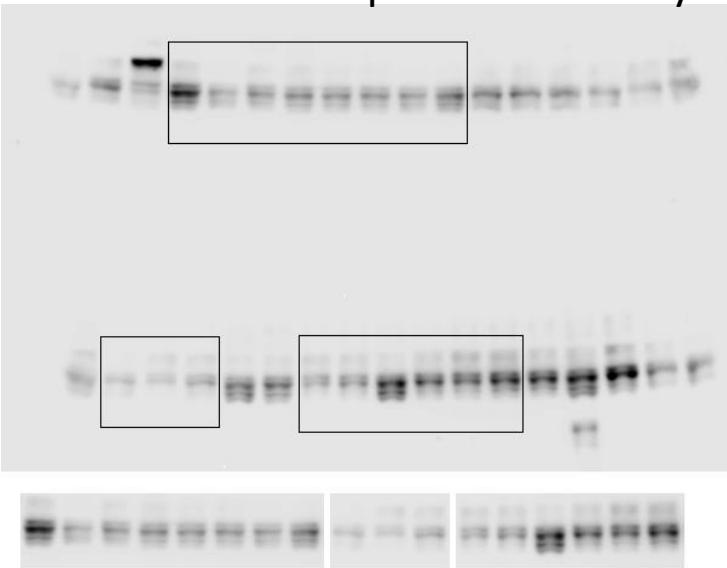

# Olfactory bulb pTau (AT8)

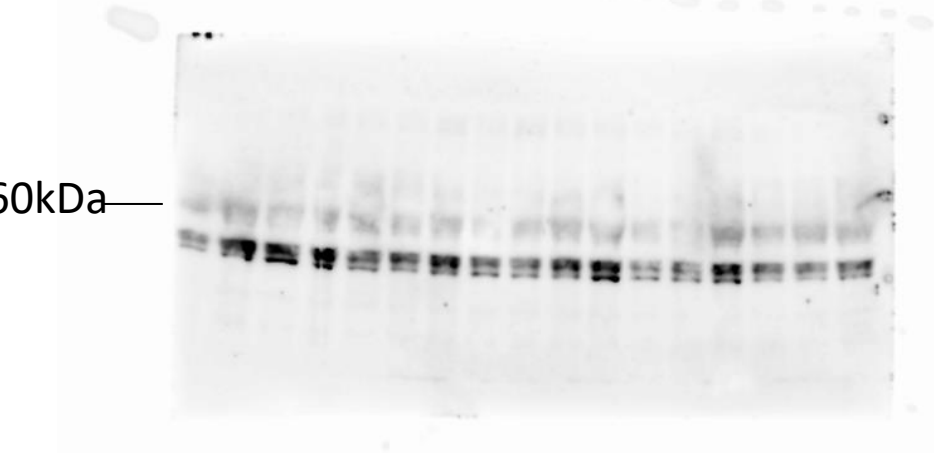

# Olfactory bulb BDNF

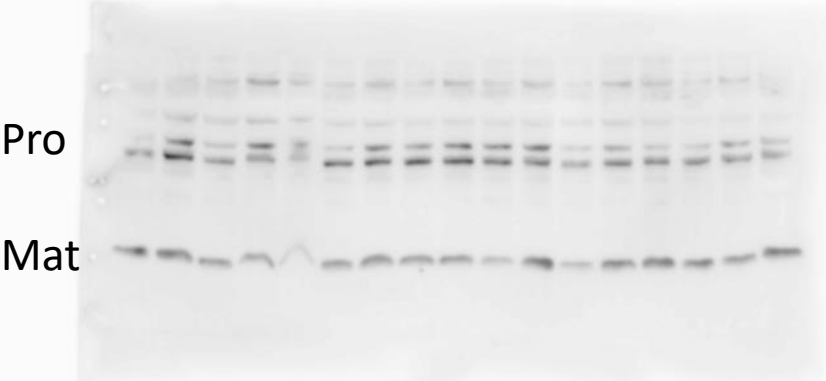

Olfactory bulb Total tau (\*including other samples)

50-60kDa {

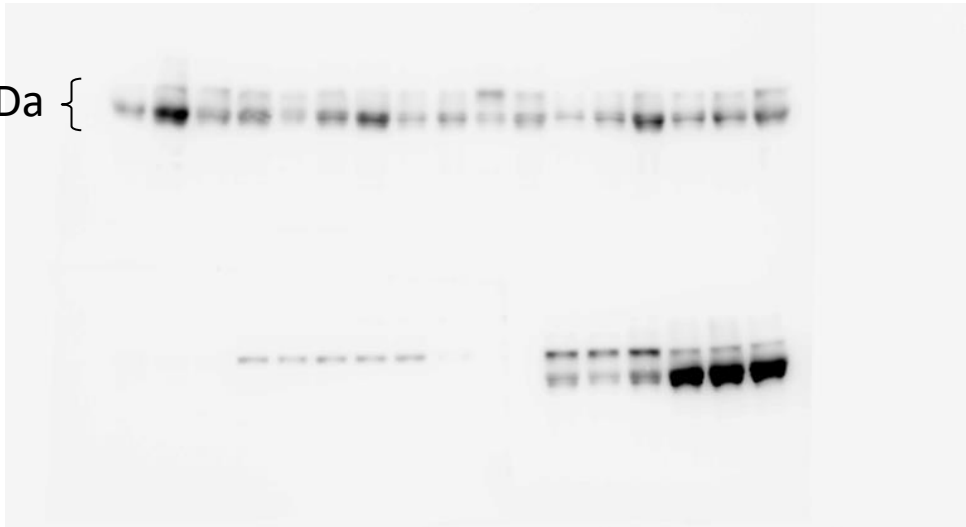

☐ : the samples in this study

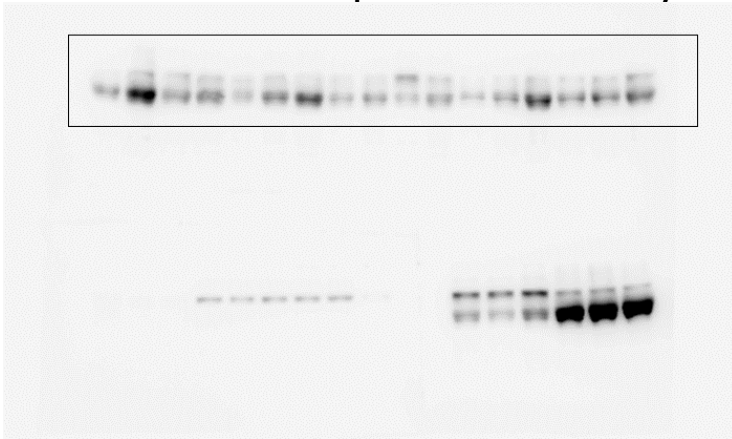

Olfactory bulb GAPDH (\*including other samples, reblot after tau detection shown above )

GAPDH  
(37kDa) —

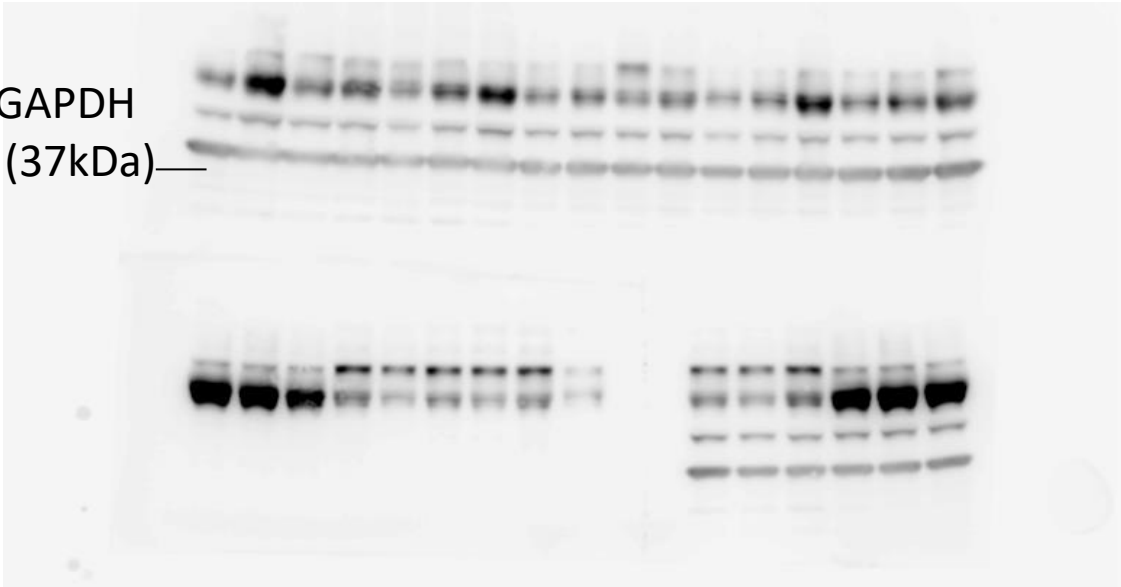

☐ : the samples in this study

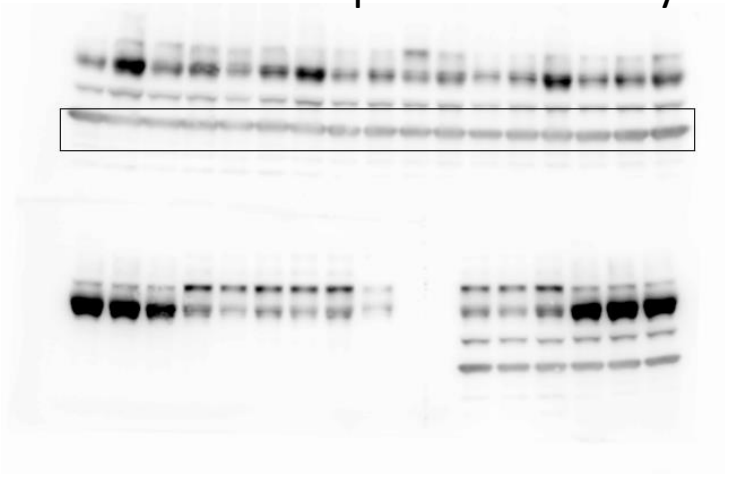

Supplement: pone.0240378.s001.pdf [file pone.0240378.s001.pdf]
